# Supplementary material for: The Golgin Protein Giantin Regulates Interconnections Between Golgi Stacks
Source: PubMed Central journal article supplement (PMC6732663; doi:10.3389/fcell.2019.00160), 2019-08-27

Supplementary Figures

A (for Figure 1)

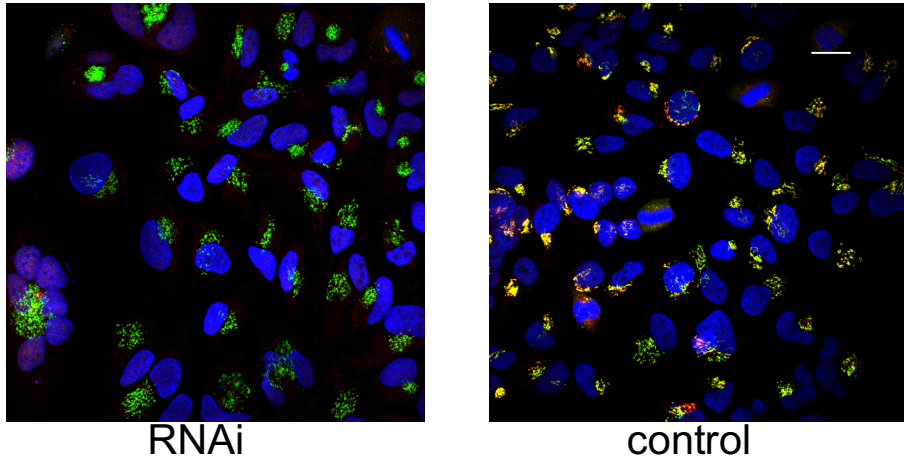

B (for Figure 2)

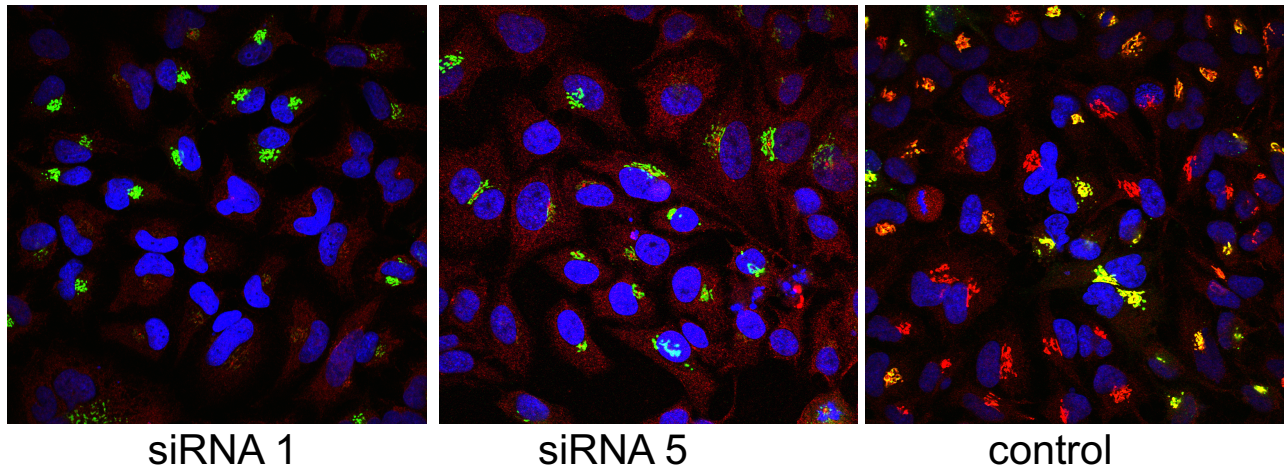

Supplement: Data_Sheet_1.pdf [file Data_Sheet_1.pdf]
